# Supplementary material for: Health effects of routine measles vaccination and supplementary immunisation activities in 14 high-burden countries: a Dynamic Measles Immunization Calculation Engine (DynaMICE) modelling study
Source: PubMed Central journal article supplement (PMC10369016; doi:10.1016/s2214-109x(23)00220-6), 2023-07-18
Supplement: mmc1.pdf [file mmc1.pdf]

# THE LANCET

## Global Health

### Supplementary appendix

This appendix formed part of the original submission and has been peer reviewed. We post it as supplied by the authors.

Supplement to: Auzenbergs M, Fu H, Abbas K, Procter SR, Cutts FT, Jit M. Health effects of routine measles vaccination and supplementary immunisation activities in 14 high-burden countries: a Dynamic Measles Immunization Calculation Engine (DynaMICE) modelling study. *Lancet Glob Health* 2023; **11**: e1194–204.

## Appendix

Health effects of routine measles vaccination and supplementary immunisation activities in 14 high-burden countries: a Dynamic Measles Immunization Calculation Engine (DynaMICE) modelling study

### Table of Contents

|                |    |
|----------------|----|
| Table S1.....  | 1  |
| Table S2.....  | 2  |
| Table S3.....  | 7  |
| Table S4.....  | 8  |
| Figure S1..... | 9  |
| Figure S2..... | 10 |
| Figure S3..... | 11 |
| Figure S4..... | 12 |
| Figure S5..... | 13 |
| Figure S6..... | 14 |
| Figure S7..... | 15 |
| Figure S8..... | 16 |

**Table S1. Number of cases across modelled countries 2010-2019 and vaccination schedules**

| Country     | Reported number of cases (WUENIC) | Estimated number of cases (IHME) | Nationally recommended age for MCV1 | Nationally recommended age for MCV2 | Year of MCV2 introduction |
|-------------|-----------------------------------|----------------------------------|-------------------------------------|-------------------------------------|---------------------------|
| India       | 192566                            | 112263832                        | 9–12 months                         | 16–24 months                        | 2011                      |
| Nigeria     | 169394                            | 15381229                         | 9 months                            | 15 months                           | 2019                      |
| Indonesia   | 115974                            | 15373892                         | 9 months                            | 18 months                           | 2003                      |
| Ethiopia    | 59824                             | 10108569                         | 9 months                            | 15 months                           | 2019                      |
| China       | 213832                            | 6171658                          | 8 months                            | 18 months                           | 2005                      |
| Philippines | 149325                            | 6050672                          | 9 months                            | 12–15 months                        | 2009                      |
| Uganda      | 20029                             | 4555096                          | 9 months                            | -                                   | -                         |
| DRC         | 791259                            | 3976920                          | 9 months                            | -                                   | -                         |
| Pakistan    | 74209                             | 3271893                          | 9 months                            | 15 months                           | 2009                      |
| Angola      | 30564                             | 3246826                          | 9 months                            | 15 months                           | 2015                      |
| Madagascar  | 234682                            | 2966145                          | 9 months                            | 15–18 months                        | 2020                      |
| Ukraine     | 129608                            | 154625                           | 12 months                           | 6 years                             | 2000                      |
| Malawi      | 118775                            | 852873                           | 9 months                            | 15 months                           | 2015                      |
| Somalia     | 80769                             | 2440208                          | 9 months                            | -                                   | -                         |

**Table S1.** For countries without available data on the recommended MCV2 schedules, we assumed the age at vaccination to be 15–18 months old [8]. In China and Philippines, where multiple types of vaccines are in use, we adopted the vaccination schedules from the two doses of MMR (measles-mumps-rubella). Year of MCV2 introduction was assumed to be the first year a country has available coverage data in the WUENIC database. (-) indicates a country has not yet introduced MCV2 and therefore, does not have a recommended age for MCV2 vaccination. In the model, MCV1 is assumed to deliver to unvaccinated infants at 9 months old in most countries, and MCV2 to previously vaccinated children at the recommended age of each country. IHME: Institute for Health Metrics and Evaluation. MCV1: the first routine dose of measles-containing vaccine. MCV2: the second routine dose of measles-containing vaccine. WUENIC: WHO and UNICEF Estimates of National Immunization Coverage.

**Table S2. Supplementary immunisation activities in 14 countries, 2000-2020.**

| Year           | Month | Target age group | Target population size | Reached doses | Coverage - target | Coverage - country-level |
|----------------|-------|------------------|------------------------|---------------|-------------------|--------------------------|
| <b>India</b>   |       |                  |                        |               |                   |                          |
| 2000           | -     | 9-59m            | 974034                 | 739417        | 75.9%             | 0.7%                     |
| 2001           | -     | 9-59m            | 1384891                | 962474        | 69.5%             | 0.9%                     |
| 2010           | Dec   | 9m-10y           | 10469901               | 9367822       | 89.5%             | 3.6%                     |
| 2011           | Apr   | 9m-10y           | 3375785                | 2709014       | 80.2%             | 1.0%                     |
| 2011           | Dec   | 9m-10y           | 30751228               | 27919442      | 90.8%             | 10.7%                    |
| 2012           | Mar   | 9m-9y            | 9416352                | 8215227       | 87.2%             | 3.5%                     |
| 2012           | Dec   | 9m-9y            | 40717834               | 36976587      | 90.8%             | 15.7%                    |
| 2013           | Jun   | 9m-9y            | 36012805               | 33639706      | 93.4%             | 14.4%                    |
| 2017           | Feb   | 9m-15y           | 16033000               | 15845000      | 98.8%             | 4.2%                     |
| 2017           | Feb   | 9m-15y           | 320000                 | 312000        | 97.5%             | 0.1%                     |
| 2017           | Apr   | 9m-15y           | 16000                  | 12000         | 75.0%             | 0.0%                     |
| 2017           | Apr   | 9m-15y           | 17605000               | 16953000      | 96.3%             | 4.5%                     |
| 2017           | Apr   | 9m-15y           | 304000                 | 266000        | 87.5%             | 0.1%                     |
| 2017           | Aug   | 9m-15y           | 11854000               | 11458000      | 96.7%             | 3.0%                     |
| 2017           | Aug   | 9m-15y           | 114000                 | 115000        | 100.9%            | 0.0%                     |
| 2017           | Aug   | 9m-15y           | 58000                  | 62000         | 106.9%            | 0.0%                     |
| 2017           | Sep   | 9m-15y           | 9001000                | 9148000       | 101.6%            | 2.4%                     |
| 2017           | Sep   | 9m-15y           | 310000                 | 301000        | 97.1%             | 0.1%                     |
| 2017           | Sep   | 9m-15y           | 1774000                | 1808000       | 101.9%            | 0.5%                     |
| 2017           | Dec   | 9m-15y           | 2836000                | 2876000       | 101.4%            | 0.8%                     |
| 2017           | Dec   | 9m-15y           | 7655000                | 6488000       | 84.8%             | 1.7%                     |
| 2018           | Feb   | 9m-15y           | 438000                 | 443000        | 101.1%            | 0.1%                     |
| 2018           | Mar   | 9m-15y           | 11225000               | 11037000      | 98.3%             | 3.0%                     |
| 2018           | May   | 9m-15y           | 324000                 | 324000        | 100.0%            | 0.1%                     |
| 2018           | May   | 9m-15y           | 818000                 | 793000        | 96.9%             | 0.2%                     |
| 2018           | Jun   | 9m-15y           | 83000                  | 78000         | 94.0%             | 0.0%                     |
| 2018           | Jul   | 9m-15y           | 6964000                | 6684000       | 96.0%             | 1.8%                     |
| 2018           | Jul   | 9m-15y           | 7438000                | 7364000       | 99.0%             | 2.0%                     |
| 2018           | Sep   | 9m-15y           | 15157000               | 14560000      | 96.1%             | 3.9%                     |
| 2018           | Oct   | 9m-15y           | 10602000               | 10257000      | 96.7%             | 2.7%                     |
| 2018           | Oct   | 9m-15y           | 1156000                | 1107000       | 95.8%             | 0.3%                     |
| 2018           | Oct   | 9m-15y           | 9209000                | 9028000       | 98.0%             | 2.4%                     |
| 2018           | Nov   | 9m-15y           | 7778000                | 7792000       | 100.2%            | 2.1%                     |
| 2018           | Nov   | 9m-15y           | 3762000                | 3757000       | 99.9%             | 1.0%                     |
| 2018           | Nov   | 9m-15y           | 449000                 | 439000        | 97.8%             | 0.1%                     |
| 2018           | Nov   | 9m-15y           | 956000                 | 897000        | 93.8%             | 0.2%                     |
| 2018           | Dec   | 9m-15y           | 76403000               | 75720000      | 99.1%             | 20.3%                    |
| 2018           | Dec   | 9m-15y           | 29052000               | 25866000      | 89.0%             | 6.9%                     |
| 2019           | Feb   | 9m-15y           | 37757000               | 38415000      | 101.7%            | 10.4%                    |
| 2019           | Feb   | 9m-15y           | 23245000               | 22822000      | 98.2%             | 6.1%                     |
| <b>Nigeria</b> |       |                  |                        |               |                   |                          |
| 2005           | Dec   | 9m-15y           | 29500000               | 28538974      | 96.7%             | 47.8%                    |
| 2006           | Oct   | 9m-15y           | 31630011               | 26353793      | 83.3%             | 42.9%                    |
| 2007           | Jan   | 9-59m            | 2583480                | 2308527       | 89.4%             | 10.7%                    |
| 2007           | Mar   | 6y-17y           | 662164                 | 517410        | 78.1%             | 1.2%                     |
| 2008           | Dec   | 9-59m            | 29828229               | 28848102      | 96.7%             | 130.4%                   |
| 2011           | Feb   | 9-59m            | 28272893               | 28435589      | 100.6%            | 119.3%                   |
| 2013           | Oct   | 9-59m            | 15957208               | 17004058      | 106.6%            | 68.0%                    |
| 2013           | Nov   | 9-59m            | 13344281               | 13575608      | 101.7%            | 54.3%                    |
| 2015           | Nov   | 6m-10y           | 23967617               | 24069024      | 100.4%            | 40.8%                    |
| 2016           | Jan   | 9-59m            | 14577013               | 19065787      | 130.8%            | 71.2%                    |
| 2018           | Feb   | 9-59m            | 37412277               | 40044875      | 107.0%            | 144.4%                   |
| 2018           | Mar   | 9-59m            | 15969475               | 16955354      | 106.2%            | 61.1%                    |
| 2019           | Nov   | 9-59m            | 20531083               | 21417932      | 104.3%            | 76.1%                    |

|                  |     |         |          |          |        |       |
|------------------|-----|---------|----------|----------|--------|-------|
| <b>Indonesia</b> |     |         |          |          |        |       |
| 2000             | -   | 6-12y   | 6665950  | 6341407  | 95.1%  | 20.8% |
| 2000             | -   | 6-59m   | 1142183  | 948012   | 83.0%  | 4.9%  |
| 2002             | Sep | 0-59m   | 166087   | 155101   | 93.4%  | 0.8%  |
| 2002             | Nov | 9-59m   | 2667343  | 2031029  | 76.1%  | 11.0% |
| 2003             | Oct | 6-12y   | 1030445  | 980754   | 95.2%  | 3.1%  |
| 2004             | -   | 6-12y   | 2180918  | 2062556  | 94.6%  | 6.5%  |
| 2005             | Feb | 6m-15y  | 4836094  | 4642650  | 96.0%  | 6.6%  |
| 2005             | -   | 6m-15y  | 679230   | 615577   | 90.6%  | 0.9%  |
| 2006             | Jan | 6-12y   | 3161323  | 3049844  | 96.5%  | 9.6%  |
| 2006             | May | 6m-5y   | 234528   | 220777   | 94.1%  | 0.9%  |
| 2006             | Aug | 6m-5y   | 3743568  | 3440698  | 91.9%  | 13.9% |
| 2007             | Feb | 6-59m   | 11237274 | 10099534 | 89.9%  | 49.7% |
| 2007             | Feb | 6m-12y  | 2692912  | 2863068  | 106.3% | 5.0%  |
| 2007             | Aug | 6y-12y  | 2569350  | 2609301  | 101.6% | 8.2%  |
| 2007             | Aug | 6-59m   | 3679318  | 3499242  | 95.1%  | 17.2% |
| 2008             | Oct | 1-3y    | 11203    | 8730     | 77.9%  | 0.1%  |
| 2009             | Oct | 9-59m   | 141685   | 126800   | 89.5%  | 0.6%  |
| 2009             | Oct | 9-59m   | 219765   | 126699   | 57.7%  | 0.6%  |
| 2009             | Oct | 9-59m   | 1763122  | 1700834  | 96.5%  | 8.7%  |
| 2010             | Oct | 9-59m   | 3619024  | 3294315  | 91.0%  | 16.7% |
| 2011             | Nov | 9-59m   | 11989559 | 11365665 | 94.8%  | 57.8% |
| 2016             | Aug | 9-59m   | 4222172  | 3638183  | 86.2%  | 17.3% |
| 2017             | Aug | 9m-15y  | 34964384 | 35307148 | 101.0% | 48.9% |
| 2018             | Oct | 9m-15y  | 31963154 | 23453882 | 73.4%  | 32.5% |
| <b>Ethiopia</b>  |     |         |          |          |        |       |
| 2000             | Jul | 9-59m   | 3800000  | 3610000  | 95.0%  | 35.0% |
| 2001             | Jan | 9-59m   | 3026147  | 2346464  | 77.5%  | 21.9% |
| 2001             | Dec | 9-59m   | 2166232  | 1646336  | 76.0%  | 15.4% |
| 2002             | Nov | 9m-14y  | 2316214  | 2277988  | 98.3%  | 7.4%  |
| 2003             | Aug | 6m-14y  | 5605502  | 5101007  | 91.0%  | 15.8% |
| 2004             | Apr | 6m-14y  | 8835802  | 7422074  | 84.0%  | 22.4% |
| 2005             | -   | 6m-14y  | 198456   | 136935   | 69.0%  | 0.4%  |
| 2005             | Sep | 9-59m   | 1073066  | 987221   | 92.0%  | 8.6%  |
| 2006             | Apr | 9-59m   | 11688720 | 10169187 | 87.0%  | 87.9% |
| 2007             | Nov | 6-59m   | 1117345  | 1072701  | 96.0%  | 8.7%  |
| 2008             | Nov | 6-59m   | 11791819 | 10848474 | 92.0%  | 86.9% |
| 2009             | Jan | 6-59m   | 773910   | 662168   | 85.6%  | 5.2%  |
| 2009             | Jan | 6-59m   | 279102   | 264134   | 94.6%  | 2.1%  |
| 2009             | Jan | 6-59m   | 62504    | 57762    | 92.4%  | 0.5%  |
| 2009             | Jun | 6-59m   | 285644   | 266621   | 93.3%  | 2.1%  |
| 2010             | Mar | 6-59m   | 1057327  | 961798   | 91.0%  | 7.5%  |
| 2010             | Oct | 9-47m   | 7656367  | 8171534  | 106.7% | 88.1% |
| 2011             | Feb | 9-47m   | 774658   | 757421   | 97.8%  | 8.1%  |
| 2011             | Oct | 6m-14y  | 7326463  | 7034264  | 96.0%  | 18.3% |
| 2013             | Jun | 9-59m   | 11873928 | 11609484 | 97.8%  | 92.3% |
| 2016             | Apr | 6m-<15y | 25706550 | 24986589 | 97.2%  | 60.1% |
| 2017             | Mar | 9m-14y  | 22035787 | 21225199 | 96.3%  | 51.3% |
| 2017             | Aug | 6-179m  | 2579178  | 2524841  | 97.9%  | 6.0%  |
| 2020             | Jul | 9-59m   | 14135353 | 13970822 | 98.8%  | 98.5% |
| <b>China</b>     |     |         |          |          |        |       |
| 2003             | Nov | 8m-12y  | 831600   | 819732   | 98.6%  | 0.4%  |
| 2004             | Nov | 8m-12y  | 10000000 | 7791796  | 77.9%  | 3.5%  |
| 2005             | Mar | 8m-14y  | 4222349  | 4032343  | 95.5%  | 1.5%  |
| 2005             | May | 8m-25y  | 2410000  | 2289500  | 95.0%  | 0.4%  |
| 2005             | Jul | 1-14y   | 5193749  | 4300424  | 82.8%  | 1.7%  |
| 2005             | Sep | 8m-14y  | 8000000  | 4800000  | 60.0%  | 1.8%  |
| 2006             | Mar | 8m-14y  | 6200000  | 5900000  | 95.2%  | 2.3%  |

|                    |     |          |           |           |        |        |
|--------------------|-----|----------|-----------|-----------|--------|--------|
| 2007               | Sep | 8m-14y   | 20400000  | 20100000  | 98.5%  | 8.1%   |
| 2008               | Jul | 8m-14y   | 35705379  | 34983574  | 98.0%  | 14.2%  |
| 2008               | Nov | 8m-6y    | 11842830  | 11570750  | 97.7%  | 11.0%  |
| 2009               | Apr | 8m-14y   | 5114101   | 5008565   | 97.9%  | 2.0%   |
| 2009               | Jul | 8m-14y   | 96487581  | 94167415  | 97.6%  | 38.4%  |
| 2010               | Sep | 8m-4y    | 106060935 | 102300000 | 96.5%  | 140.1% |
| <b>Philippines</b> |     |          |           |           |        |        |
| 2002               | Jun | 9-59m    | 507463    | 500897    | 98.7%  | 5.3%   |
| 2004               | Mar | 9m-7y    | 18394880  | 17291555  | 94.0%  | 108.0% |
| 2007               | Nov | 9-48m    | 8648864   | 8201862   | 94.8%  | 85.7%  |
| 2009               | Aug | 15-23m   | 787693    | 459682    | 58.4%  | 7.8%   |
| 2010               | Jul | 9-59m    | -         | 420129    | -      | 4.5%   |
| 2011               | May | 9-95m    | 18651791  | 15649907  | 83.9%  | 98.8%  |
| 2013               | Nov | 6-59m    | -         | 1937471   | -      | 19.0%  |
| 2013               | Dec | 6-59m    | -         | 108783    | -      | 1.1%   |
| 2014               | Jan | 6-36m    | 2183971   | 1695930   | 77.7%  | 29.3%  |
| 2014               | Sep | 9-59m    | 11485540  | 10402489  | 90.6%  | 107.3% |
| 2018               | May | 6-59m    | 4205517   | 2893466   | 68.8%  | 28.9%  |
| 2018               | Oct | 6-59m    | 6604059   | 2089432   | 31.6%  | 20.9%  |
| 2019               | Apr | 6-59m    | 3784099   | 3920103   | 103.6% | 40.1%  |
| 2019               | Jul | 5-12y    | 8575452   | 2457514   | 28.7%  | 13.7%  |
| 2019               | Jul | 13y-100y | 2179336   | 947677    | 43.5%  | 1.2%   |
| <b>Uganda</b>      |     |          |           |           |        |        |
| 2000               | Mar | 9-59m    | 1596240   | 1218737   | 76.4%  | 30.7%  |
| 2000               | Nov | 9-59m    | 1030490   | 957876    | 93.0%  | 24.2%  |
| 2001               | Oct | 9m-14y   | 503904    | 614156    | 121.9% | 5.4%   |
| 2003               | Oct | 6m-14y   | 12861020  | 13457127  | 104.6% | 108.8% |
| 2005               | Feb | 9-23m    | 389696    | 557869    | 143.2% | 41.5%  |
| 2006               | Aug | 6-59m    | 5263090   | 5239221   | 99.5%  | 103.9% |
| 2009               | Jun | 9-47m    | 4699748   | 4893634   | 104.1% | 122.7% |
| 2012               | May | 6-59m    | 6314309   | 6283441   | 99.5%  | 107.0% |
| 2015               | Oct | 6-59m    | 6658881   | 6349182   | 95.3%  | 101.0% |
| 2019               | Oct | 9m-<15y  | 18200969  | 19432256  | 106.8% | 100.2% |
| <b>DRC</b>         |     |          |           |           |        |        |
| 2000               | Oct | 9-59m    | 1926879   | 1395451   | 72.4%  | 19.3%  |
| 2003               | Jan | 6m-15y   | 5774245   | 5554824   | 96.2%  | 23.5%  |
| 2003               | Feb | 6m-15y   | 100000    | 108000    | 108.0% | 0.5%   |
| 2004               | Oct | 6m-15y   | 10055523  | 8604754   | 85.6%  | 35.3%  |
| 2005               | Oct | 6m-15y   | 7817076   | 6957653   | 89.0%  | 27.6%  |
| 2006               | Aug | 6-59m    | 2189069   | 2158329   | 98.6%  | 22.9%  |
| 2006               | Nov | 6m-15y   | 7164815   | 6966200   | 97.2%  | 26.7%  |
| 2007               | Aug | 6-59m    | 3736672   | 3768794   | 100.9% | 38.5%  |
| 2008               | Nov | 6-59m    | 2852430   | 2811092   | 98.6%  | 27.8%  |
| 2009               | Nov | 6-59m    | 2593478   | 2412168   | 93.0%  | 23.1%  |
| 2010               | Jan | 6-59m    | 1226792   | 1259363   | 102.7% | 11.7%  |
| 2011               | Feb | 6-59m    | 1673147   | 1701315   | 101.7% | 15.2%  |
| 2011               | Mar | 6-59m    | 2672338   | 2649574   | 99.1%  | 23.7%  |
| 2011               | Apr | 6-59m    | 415909    | 430571    | 103.5% | 3.8%   |
| 2011               | May | 6-59m    | 5227315   | 4864554   | 93.1%  | 43.4%  |
| 2011               | Jun | 6-59m    | 272392    | 266811    | 98.0%  | 2.4%   |
| 2012               | Jan | 6-59m    | 845002    | 948237    | 112.2% | 8.2%   |
| 2012               | Jan | 6-59m    | 314283    | 303786    | 96.7%  | 2.6%   |
| 2012               | Jan | 6-59m    | 1253230   | 1239803   | 98.9%  | 10.7%  |
| 2012               | Aug | 6-59m    | 170530    | 175467    | 102.9% | 1.5%   |
| 2013               | Sep | 6m-9y    | 6794574   | 6813783   | 100.3% | 29.9%  |
| 2013               | Dec | 6m-9y    | 4087697   | 4213293   | 103.1% | 18.5%  |
| 2014               | Mar | 6m-9y    | 5346158   | 5482612   | 102.6% | 23.3%  |
| 2014               | May | 6m-9y    | 6137295   | 6211685   | 101.2% | 26.4%  |

|                   |     |         |          |          |        |        |
|-------------------|-----|---------|----------|----------|--------|--------|
| 2014              | Jun | 6m-9y   | 2883624  | 2803550  | 97.2%  | 11.9%  |
| 2014              | Jul | 6m-9y   | 1196822  | 1163251  | 97.2%  | 4.9%   |
| 2014              | Aug | 6m-9y   | 2858403  | 2878785  | 100.7% | 12.2%  |
| 2016              | Aug | 6-59m   | 7081288  | 7212977  | 101.9% | 55.7%  |
| 2016              | Oct | 6-59m   | 3725998  | 3708843  | 99.5%  | 28.6%  |
| 2017              | Feb | 6-59m   | 5291916  | 5466923  | 103.3% | 41.2%  |
| <b>Pakistan</b>   |     |         |          |          |        |        |
| 2005              | Dec | 12-59m  | 1600000  | 1232000  | 77.0%  | 6.8%   |
| 2007              | Mar | 9m-15y  | 2571536  | 2511837  | 97.7%  | 3.8%   |
| 2007              | Jul | 9m-13y  | 1219364  | 1282232  | 105.2% | 2.2%   |
| 2007              | Aug | 9m-13y  | 6890603  | 6906376  | 100.2% | 11.9%  |
| 2007              | Nov | 9m-13y  | 21262960 | 20566497 | 96.7%  | 35.5%  |
| 2008              | Mar | 9m-13y  | 34123305 | 35315375 | 103.5% | 60.3%  |
| 2010              | Feb | 9m-<13y | 15209539 | 13740906 | 90.3%  | 24.8%  |
| 2010              | Sep | 6-59m   | 7359790  | 6991065  | 95.0%  | 32.5%  |
| 2010              | Oct | 6-59m   | 988224   | 1007195  | 101.9% | 4.7%   |
| 2011              | Jan | 9-59m   | 1401269  | 1299618  | 92.7%  | 6.3%   |
| 2011              | Jan | 9-59m   | 872287   | 784337   | 89.9%  | 3.8%   |
| 2011              | Jan | 9-59m   | 5143498  | 5098071  | 99.1%  | 24.8%  |
| 2011              | Feb | 9-59m   | 2028374  | 1744206  | 86.0%  | 8.5%   |
| 2011              | Jul | 9-59m   | 225947   | 205551   | 91.0%  | 1.0%   |
| 2011              | Nov | 9-59m   | 570538   | 547716   | 96.0%  | 2.7%   |
| 2012              | Dec | 9m-9y   | 1918267  | 1954175  | 101.9% | 4.5%   |
| 2014              | May | 6m-9y   | 13418263 | 14026013 | 104.5% | 30.4%  |
| 2014              | May | 6m-9y   | 9346563  | 9432492  | 100.9% | 20.4%  |
| 2014              | Dec | 6m-9y   | 1438492  | 1439892  | 100.1% | 3.1%   |
| 2015              | Feb | 6m-10y  | 29670753 | 30633406 | 103.2% | 59.7%  |
| 2015              | Feb | 6m-10y  | 240921   | 227762   | 94.5%  | 0.4%   |
| 2015              | Feb | 6m-10y  | 165355   | 204308   | 123.6% | 0.4%   |
| 2015              | Apr | 6m-10y  | 3474044  | 3512771  | 101.1% | 6.8%   |
| 2015              | May | 6m-10y  | 414494   | 413695   | 99.8%  | 0.8%   |
| 2015              | Aug | 6m-10y  | 1607543  | 1519242  | 94.5%  | 3.0%   |
| 2017              | Aug | 9-59m   | 1355202  | 1279819  | 94.4%  | 5.7%   |
| 2018              | Oct | 9-59m   | 35199413 | 37131234 | 105.5% | 161.4% |
| <b>Angola</b>     |     |         |          |          |        |        |
| 2003              | May | 9m-14y  | 7642739  | 7226105  | 94.5%  | 90.8%  |
| 2006              | Jul | 9-59m   | 3218676  | 3210160  | 99.7%  | 100.2% |
| 2009              | Jun | 9-59m   | 3430913  | 3469806  | 101.1% | 96.3%  |
| 2011              | Sep | 9-59m   | 5472822  | 4635248  | 84.7%  | 119.1% |
| 2014              | Sep | 6m-9y   | 7829940  | 9169335  | 117.1% | 104.8% |
| 2018              | Apr | 6m-14y  | 12858213 | 12001436 | 93.3%  | 86.7%  |
| 2019              | May | 6m-4y   | 108673   | 127740   | 117.5% | 2.5%   |
| 2019              | May | 6m-4y   | 84101    | 110280   | 131.1% | 2.2%   |
| 2019              | Jun | 6m-4y   | 141802   | 164410   | 115.9% | 3.2%   |
| <b>Madagascar</b> |     |         |          |          |        |        |
| 2004              | Sep | 9m-14y  | 7626090  | 7546229  | 99.0%  | 100.5% |
| 2007              | Oct | 9-59m   | 3123163  | 3053702  | 97.8%  | 112.0% |
| 2010              | Oct | 9-47m   | 2603510  | 2415792  | 92.8%  | 108.7% |
| 2013              | Oct | 9-59m   | 3610265  | 3316542  | 91.9%  | 109.8% |
| 2016              | Oct | 9-59m   | 3715133  | 3547466  | 95.5%  | 111.6% |
| <b>Ukraine</b>    |     |         |          |          |        |        |
| 2008              | May | 15-29y  | 8000000  | 113000   | 1.4%   | 1.1%   |
| 2017              | Oct | 1-9y    | 287240   | 163782   | 57.0%  | 3.7%   |
| 2017              | Oct | 6-9y    | 231102   | 154430   | 66.8%  | 7.7%   |
| 2019              | Apr | 1-18y   | 506232   | 387731   | 76.6%  | 4.7%   |
| 2019              | Apr | 6-18y   | 618756   | 462407   | 74.7%  | 7.8%   |
| <b>Malawi</b>     |     |         |          |          |        |        |
| 2002              | Aug | 9-59m   | 1583664  | 1906985  | 120.4% | 106.8% |

|                |     |        |         |         |        |        |
|----------------|-----|--------|---------|---------|--------|--------|
| 2005           | Sep | 9-59m  | 1851176 | 2137152 | 115.4% | 111.3% |
| 2008           | Oct | 9-59m  | 2120557 | 2087375 | 98.4%  | 99.5%  |
| 2010           | Aug | 9m-15y | 6370409 | 6785428 | 106.5% | 101.9% |
| 2013           | Nov | 6-59m  | 2297546 | 2405018 | 104.7% | 97.5%  |
| 2015           | May | 9-59m  | 436257  | 453202  | 103.9% | 19.2%  |
| 2017           | Jun | 9m-14y | 7991666 | 8132788 | 101.8% | 109.9% |
| <b>Somalia</b> |     |        |         |         |        |        |
| 2005           | Nov | 9m-15y | 384725  | 319321  | 83.0%  | 6.5%   |
| 2006           | May | 9m-15y | 2266917 | 2019717 | 89.1%  | 39.7%  |
| 2007           | Jun | 9m-15y | 3191161 | 2774178 | 86.9%  | 52.9%  |
| 2008           | Mar | 9m-15y | 150000  | 142654  | 95.1%  | 2.6%   |
| 2008           | Dec | 9m-15y | 238355  | 138205  | 58.0%  | 2.6%   |
| 2009           | Mar | 9-59m  | 1483134 | 909687  | 61.3%  | 49.0%  |
| 2009           | Apr | 9-59m  | 1117384 | 835927  | 74.8%  | 45.0%  |
| 2009           | Aug | 9-59m  | 380911  | 276994  | 72.7%  | 14.9%  |
| 2010           | Mar | 9-59m  | 1562336 | 1335892 | 85.5%  | 70.4%  |
| 2011           | Apr | 9-59m  | -       | 2924    | -      | 0.1%   |
| 2011           | Jul | 6m-15y | 90000   | 71653   | 79.6%  | 1.2%   |
| 2011           | Jul | 9-59m  | 169414  | 151279  | 89.3%  | 7.8%   |
| 2011           | Jul | 9-59m  | 380911  | 323986  | 85.1%  | 16.6%  |
| 2011           | Aug | 6m-15y | 745234  | 656226  | 88.1%  | 10.9%  |
| 2011           | Sep | 6m-15y | 86373   | 74300   | 86.0%  | 1.2%   |
| 2011           | Oct | 6m-14y | 672054  | 626625  | 93.2%  | 11.0%  |
| 2012           | Mar | 6-59m  | 578457  | 509042  | 88.0%  | 24.0%  |
| 2012           | Mar | 6m-4y  | 1012879 | 886033  | 87.5%  | 41.8%  |
| 2012           | Oct | 9-59m  | 959424  | 872230  | 90.9%  | 43.8%  |
| 2013           | Dec | 6m-4y  | 1029870 | 923580  | 89.7%  | 43.0%  |
| 2014           | Oct | 9-59m  | 1483574 | 1306426 | 88.1%  | 63.6%  |
| 2015           | Dec | 9m-9y  | 3884554 | 3518358 | 90.6%  | 82.7%  |
| 2016           | Aug | 9-59m  | 676557  | 602136  | 89.0%  | 28.2%  |
| 2017           | Feb | 6-59m  | 4700000 | 4400000 | 93.6%  | 189.4% |
| 2017           | May | 6m-5y  | 503812  | 472033  | 93.7%  | 16.9%  |
| 2018           | Jan | 6m-10y | 4745484 | 4424261 | 93.2%  | 86.5%  |
| 2019           | Nov | 6-59m  | 1149117 | 1061064 | 92.3%  | 43.3%  |

**Table S2.** WHO records for measles SIAs with a confirmed status of implementation between 2000–2020 in the 14 countries were extracted. We excluded SIAs for the purpose of outbreak response, since they were usually driven by emergency events and restricted in a local area. (-) indicates missing information in the records. Year and month denote the mid-point of each campaign and July 1<sup>st</sup> is assigned for SIAs with missing dates. Two coverage estimates are presented: one is calculated from the number of target population reported in each SIA (sub-national), and the other is based on the country-level population from the World Population Prospects 2019 at the target age group (national). When there is no information on target population in the WHO records, the sub-national coverage estimates are assumed to be the same as national ones in the analysis. DRC: Democratic Republic of the Congo. SIA: supplementary immunisation activity.



**Table S3. Percentage of years over 2000–2020 showing a smaller number of susceptible children than the birth cohort size**

| Country                                                       | No vaccination | MCV1          | MCV1+ MCV2    | MCV1+SIA         | MCV1+MCV2+SIA    |
|---------------------------------------------------------------|----------------|---------------|---------------|------------------|------------------|
| India                                                         | 0%             | 0%            | 9.5%          | 0%               | 14%              |
| Nigeria                                                       | 0%             | 0%            | 0%            | 24%              | 24%              |
| Indonesia                                                     | 0%             | 0%            | 0%            | 9.5%             | 24%              |
| Ethiopia                                                      | 0%             | 0%            | 0%            | 14%              | 14%              |
| China                                                         | 0%             | 0%            | 67%           | 19%              | 67%              |
| Philippines                                                   | 0%             | 0%            | 0%            | 24%              | 38%              |
| Uganda                                                        | 0%             | 0%            | 0%            | 38%              | 38%              |
| DRC                                                           | 0%             | 0%            | 0%            | 14%              | 14%              |
| Pakistan                                                      | 0%             | 0%            | 0%            | 19%              | 33%              |
| Angola                                                        | 0%             | 0%            | 0%            | 24%              | 24%              |
| Madagascar                                                    | 0%             | 0%            | 0%            | 29%              | 29%              |
| Ukraine                                                       | 0%             | 0%            | 0%            | 0%               | 0%               |
| Malawi                                                        | 0%             | 0%            | 4.8%          | 48%              | 57%              |
| Somalia                                                       | 0%             | 0%            | 0%            | 4.8%             | 4.8%             |
| Median<br>(25 <sup>th</sup> –75 <sup>th</sup><br>percentiles) | 0%<br>(0%–0%)  | 0%<br>(0%–0%) | 0%<br>(0%–0%) | 19%<br>(11%–24%) | 24%<br>(14%–37%) |

**Table S3.** This table presents the percentage of years over the analysis period that had an outbreak potential among different vaccination strategies. The outbreak potential in a year is indicated by a larger size of susceptible population under 5 years old compared to the size of birth cohort in each country. The median and 25<sup>th</sup> and 75<sup>th</sup> percentiles of percentage among 14 countries are shown in the bottom row. DRC: Democratic Republic of the Congo. MCV1: the first routine dose of measles-containing vaccine. MCV2: the second routine dose of measles-containing vaccine. SIA: supplementary immunisation activity.

**Table S4. Averted deaths (thousands) across different vaccination strategies from 2000–2020**

| Country by MCV2 introduction year | Comparator: no vaccination |            | Comparator: MCV1 alone |             |                    |
|-----------------------------------|----------------------------|------------|------------------------|-------------|--------------------|
|                                   | MCV1 + MCV2 + SIAs         | MCV1 alone | MCV1 + SIAs            | MCV1 + MCV2 | MCV1 + MCV2 + SIAs |
| <b>MCV2 &lt; 2017</b>             |                            |            |                        |             |                    |
| India                             | 2392                       | 2223       | 125                    | 84          | 169                |
| Indonesia                         | 373                        | 308        | 48                     | 30          | 65                 |
| China                             | 1544                       | 1377       | 91                     | 149         | 168                |
| Philippines                       | 199                        | 160        | 35                     | 9.82        | 38                 |
| Pakistan                          | 1368                       | 989        | 365                    | 94          | 379                |
| Angola                            | 531                        | 262        | 266                    | 9.93        | 269                |
| Ukraine                           | 56                         | 50         | 0.18                   | 5.84        | 6.01               |
| Malawi                            | 337                        | 264        | 72                     | 5.69        | 73                 |
| <b>MCV2 &gt; 2017</b>             |                            |            |                        |             |                    |
| Nigeria                           | 2918                       | 1475       | 1443                   | 5.19        | 1443               |
| Ethiopia                          | 1712                       | 858        | 852                    | 9.45        | 854                |
| Madagascar                        | 192                        | 135        | 57                     | 0.21        | 57                 |
| <b>No MCV2</b>                    |                            |            |                        |             |                    |
| Uganda                            | 798                        | 546        | 252                    | 0           | 252                |
| DRC                               | 1352                       | 841        | 511                    | 0           | 511                |
| Somalia                           | 229                        | 110        | 119                    | 0           | 119                |
| <b>Total</b>                      | 14002                      | 9598       | 4237                   | 404         | 4403               |

**Table S4.** This table presents the total deaths averted in the 5 pairs of vaccination delivery strategies for comparison. Sums of the averted deaths in the 14 countries are shown in the last row of the table. DRC: Democratic Republic of the Congo. MCV1: the first routine dose of measles-containing vaccine. MCV2: the second routine dose of measles-containing vaccine. SIA: supplementary immunisation activity

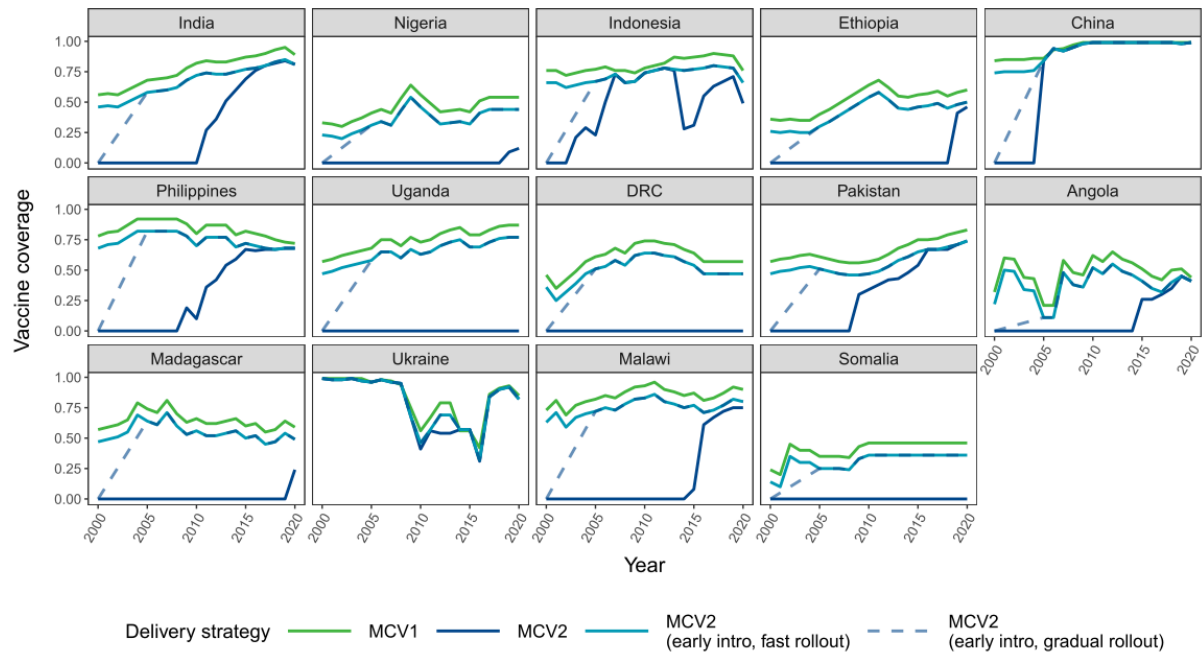

**Figure S1. Immunisation coverage for early introduction of MCV2 over 2000–2020.**

In the sensitivity analysis, all countries were assumed to introduce MCV2 early in 2000, with each year's coverage 10% lower than MCV1 coverage, or the same as the country's actual MCV2 coverage in that year, whichever was larger. Under fast rollout, MCV2 coverage would reach the assumed level in 2000, whereas MCV2 coverage would increase linearly over 2000–2005. DRC: Democratic Republic of the Congo. MCV1: the first routine dose of measles-containing vaccine. MCV2: the second routine dose of measles-containing vaccine.

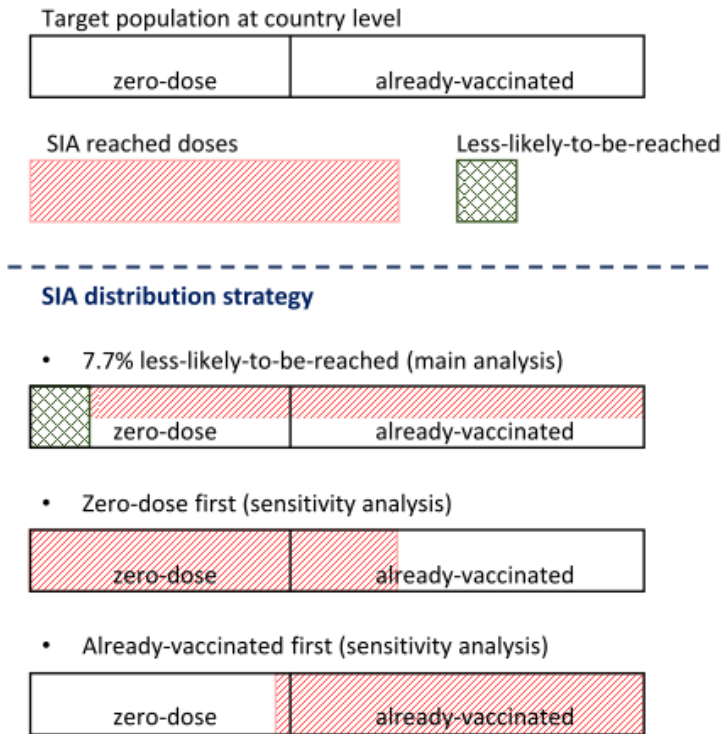

**Figure S2. Distribution strategies of SIAs included in the analysis.**

In the main analysis, 7.7% of target population are assumed less likely to receive MCV doses through current immunisation programmes and SIAs doses are given randomly to the rest of population. In addition, the distribution strategies to direct SIA doses first to MCV zero-dose and already-vaccinated children are assessed respectively in the sensitivity analysis. MCV: measles-containing vaccine. SIA: supplementary immunisation activity.

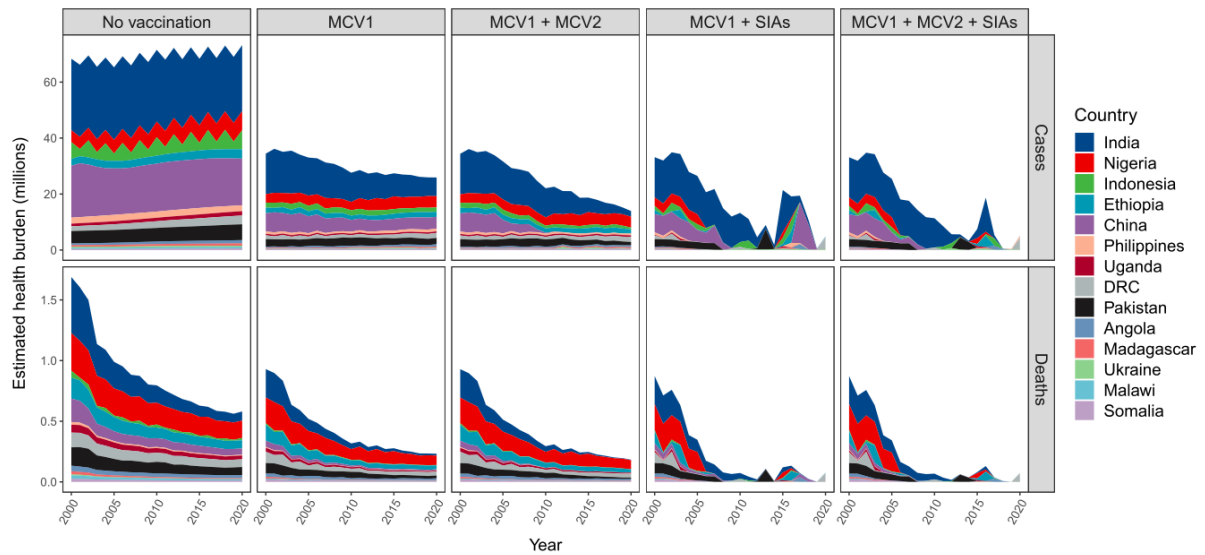

**Figure S3. Annual number of measles cases (top row) and deaths (bottom row) across different vaccination delivery strategies over 2000–2020.**

Country measles burden is present in different colours and stacked over time. The measles burden decreases with adding vaccination delivery strategies. DRC: Democratic Republic of the Congo. MCV1: the first routine dose of measles-containing vaccine. MCV2: the second routine dose of measles-containing vaccine. SIA: supplementary immunisation activity.

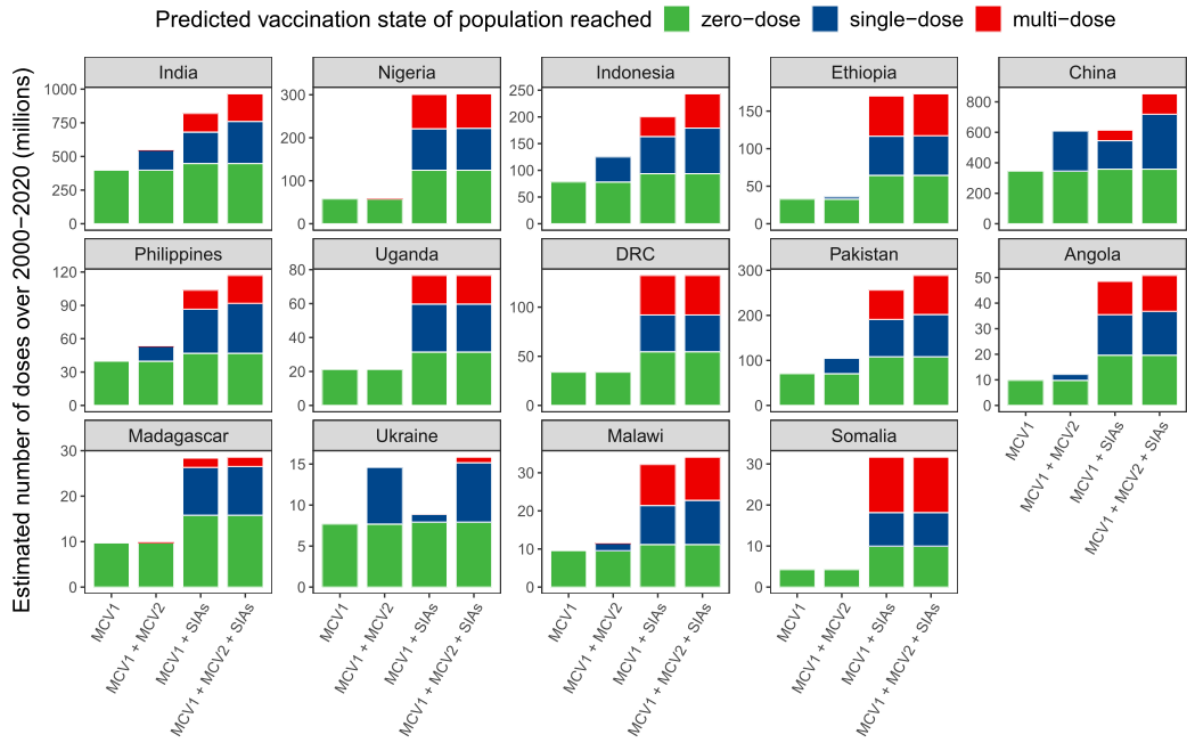

**Figure S4. Doses reaching zero-dose, single-dose, and multiple-dose children across different vaccination delivery strategies**

Total vaccine doses administrated over 2000–2020 are aggregated by estimated vaccination state of the target children reached. DRC: Democratic Republic of the Congo. MCV1: the first routine dose of measles-containing vaccine. MCV2: the second routine dose of measles-containing vaccine. SIA: supplementary immunisation activity.

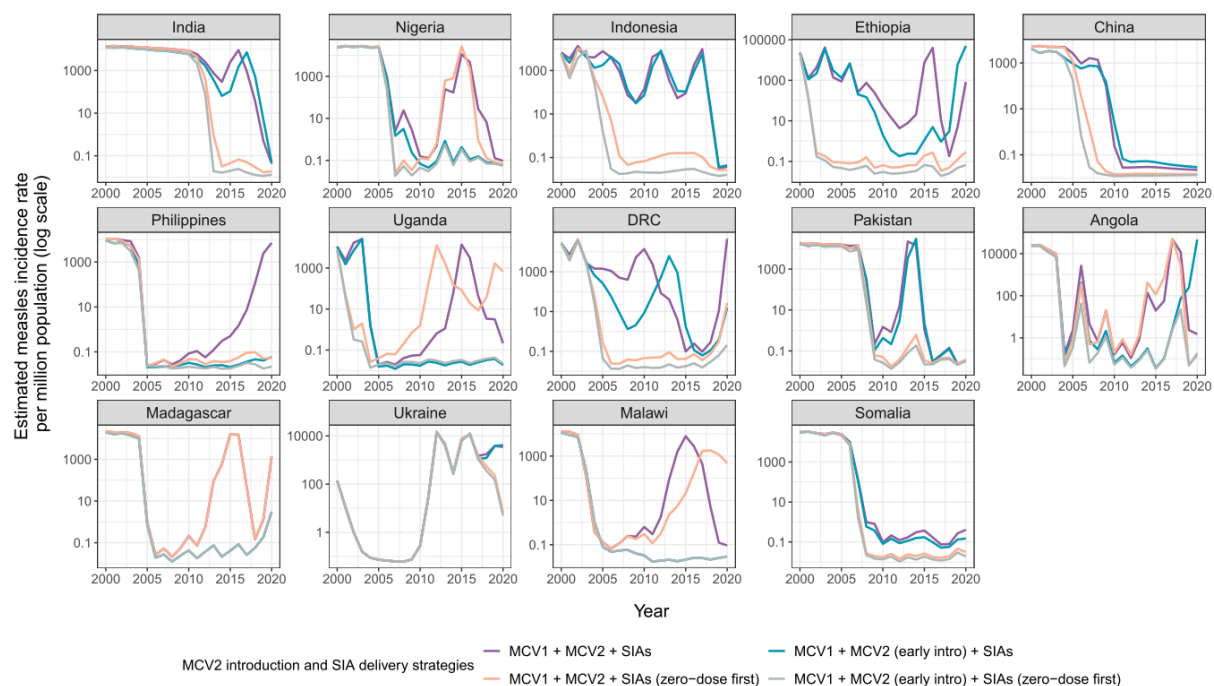

**Figure S5. Estimated measles incidence rate (per million) under alternative assumptions of delivering MCV2 and SIAs over 2000–2020.**

To estimate the impact of “optimal” vaccination impact (though not changing assumed MCV1 coverage or overall SIA coverage), we combined the alternative assumptions of early MCV2 introduction and SIA dose allocation prioritised for zero-dose populations. Incidence rates for different strategies are in different colours. Note that the y-axis is on the log scale. DRC: Democratic Republic of the Congo. MCV1: the first routine dose of measles-containing vaccine. MCV2: the second routine dose of measles-containing vaccine. SIA: supplementary immunisation activity.

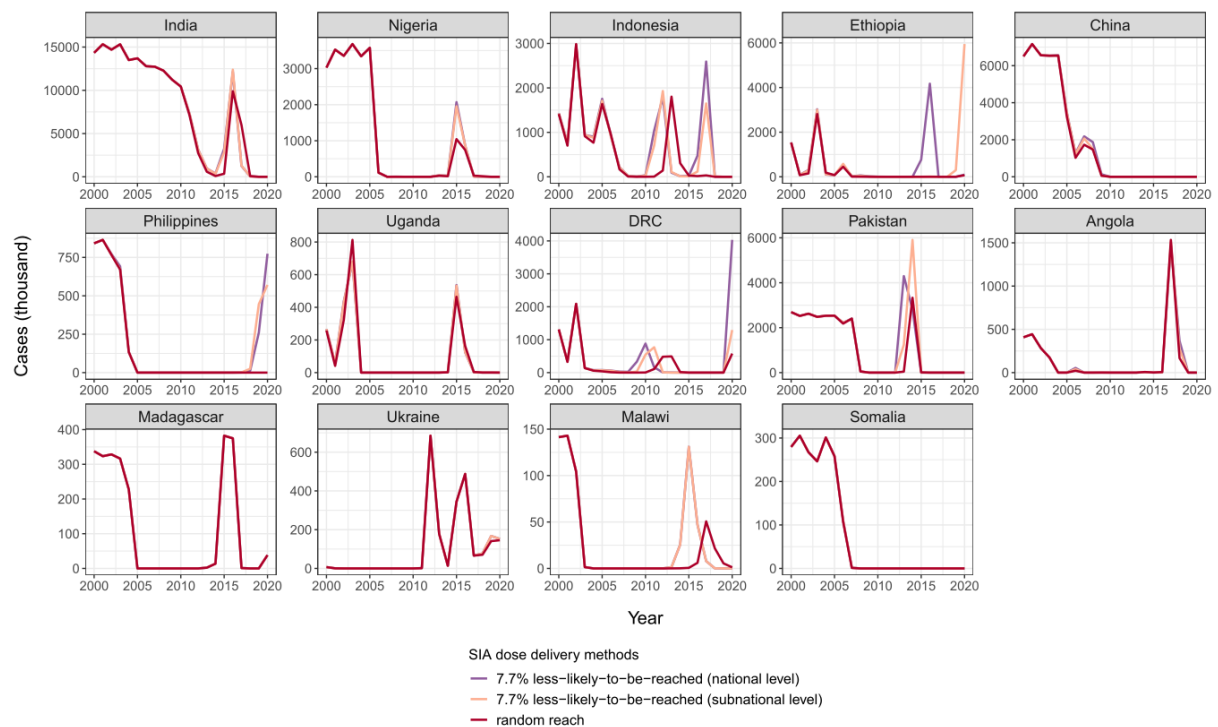

**Figure S6. Estimated measles cases (thousands) under different assumptions of SIA dose distribution over 2000–2020.**

This figure shows estimated measles cases using three SIA dose delivery methods based on historical coverage of MCV1, MCV2, and SIAs over 2000–2020. In the main analysis, we used the national SIA coverage and assumed SIA doses to be distributed equally to the zero-dose and already-vaccinated populations except for 7.7% of children who are considered less likely to be reached under current immunisation programmes. Alternatively, distributing SIA doses at the subnational level while holding the 7.7%-less-likely-to-be-reach assumption would result in fewer estimated measles cases. Random distribution of SIA doses leads to the lowest burden among the three delivery methods due to better targeting the zero-dose population. DRC: Democratic Republic of the Congo. MCV1: the first routine dose of measles-containing vaccine. MCV2: the second routine dose of measles-containing vaccine. SIA: supplementary immunisation activity.



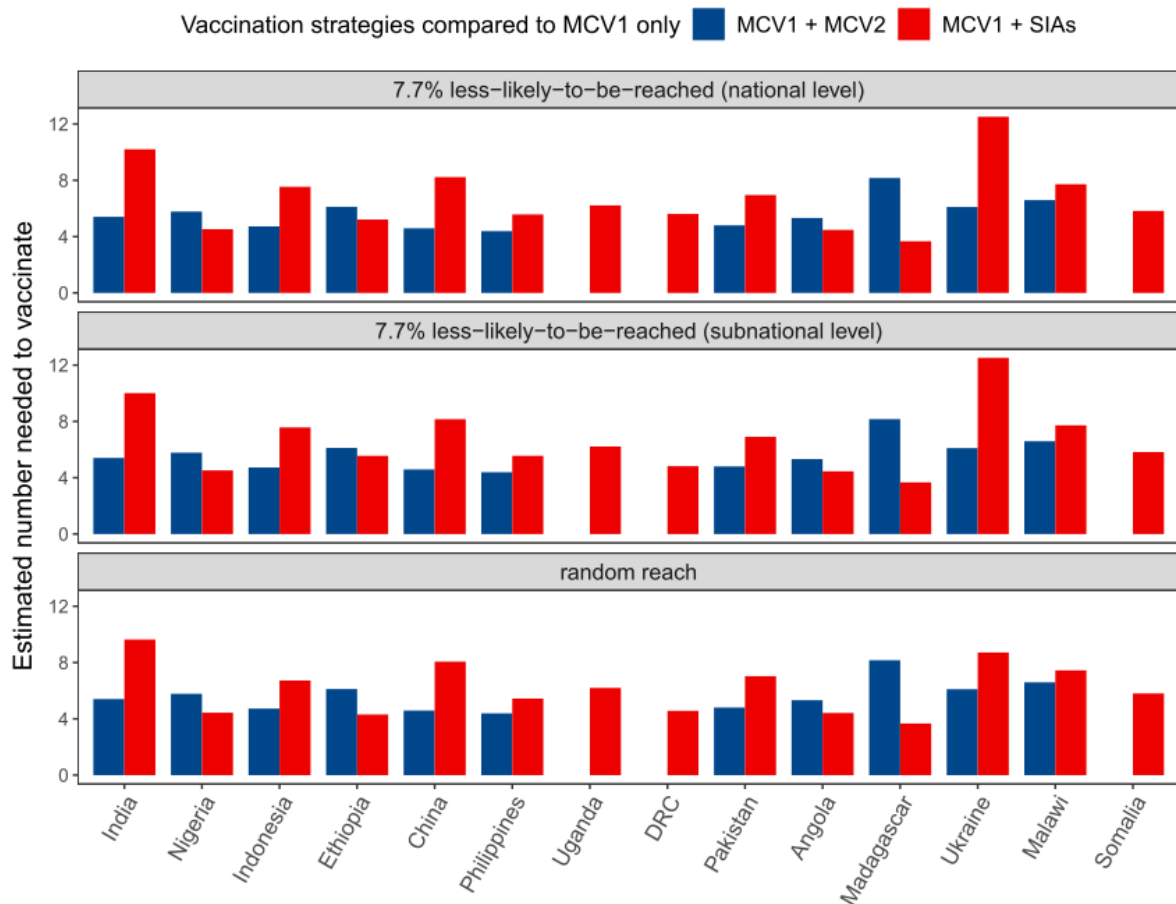

**Figure S7. Estimated number needed to vaccinate to avert a measles case under different assumptions of SIA dose distribution over 2000–2020.**

The number needed to vaccinate is calculated by dividing the number of additional doses by the number of averted measles cases. The comparator vaccination strategy of MCV1 only was used. DRC: Democratic Republic of the Congo. MCV1: the first routine dose of measles-containing vaccine. MCV2: the second routine dose of measles-containing vaccine. SIA: supplementary immunisation activity.

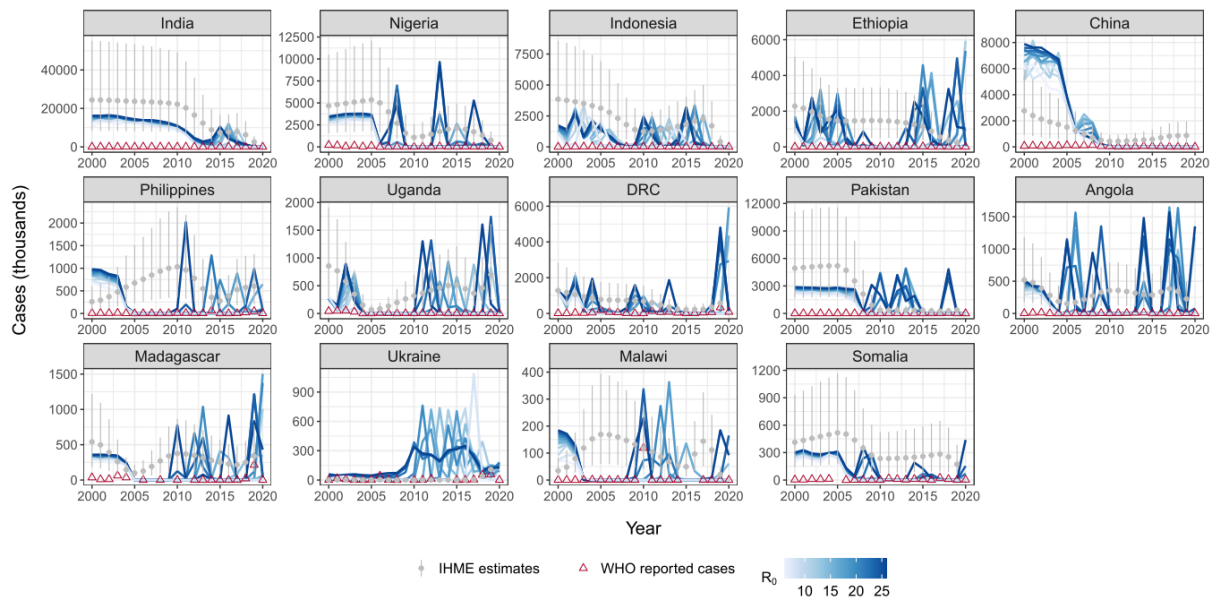

**Figure S8. Estimated measles cases and reported cases under different values of  $R_0$  over 2000–2020.**

Blue solid lines denote model estimates of measles cases by different values of  $R_0$ , based on historical coverage of MCV1, MCV2, and SIAs over 2000–2020. WHO data for reported measles cases and IHME incidence estimates from the Global Burden of Disease 2019 study are included for comparison. The magnitude and trend of our model burden estimates show similarities to the IHME estimates. However, these case estimates are substantially different from the WHO country notifications, which suffer from underreporting and varying capacity for surveillance and diagnosis over time. DRC: Democratic Republic of the Congo. IHME: Institute for Health Metrics and Evaluation. MCV1: the first routine dose of measles-containing vaccine. MCV2: the second routine dose of measles-containing vaccine. SIA: supplementary immunisation activity.
